# Supplementary material for: “Protein aggregates” contain RNA and DNA, entrapped by misfolded proteins but largely rescued by slowing translational elongation
Source: PubMed Central journal article supplement (PMC8135009; doi:10.1111/acel.13326), 2021-03-31

# Supplementary Figure 1. Mapping of

Region Displayed: 0-47M bp

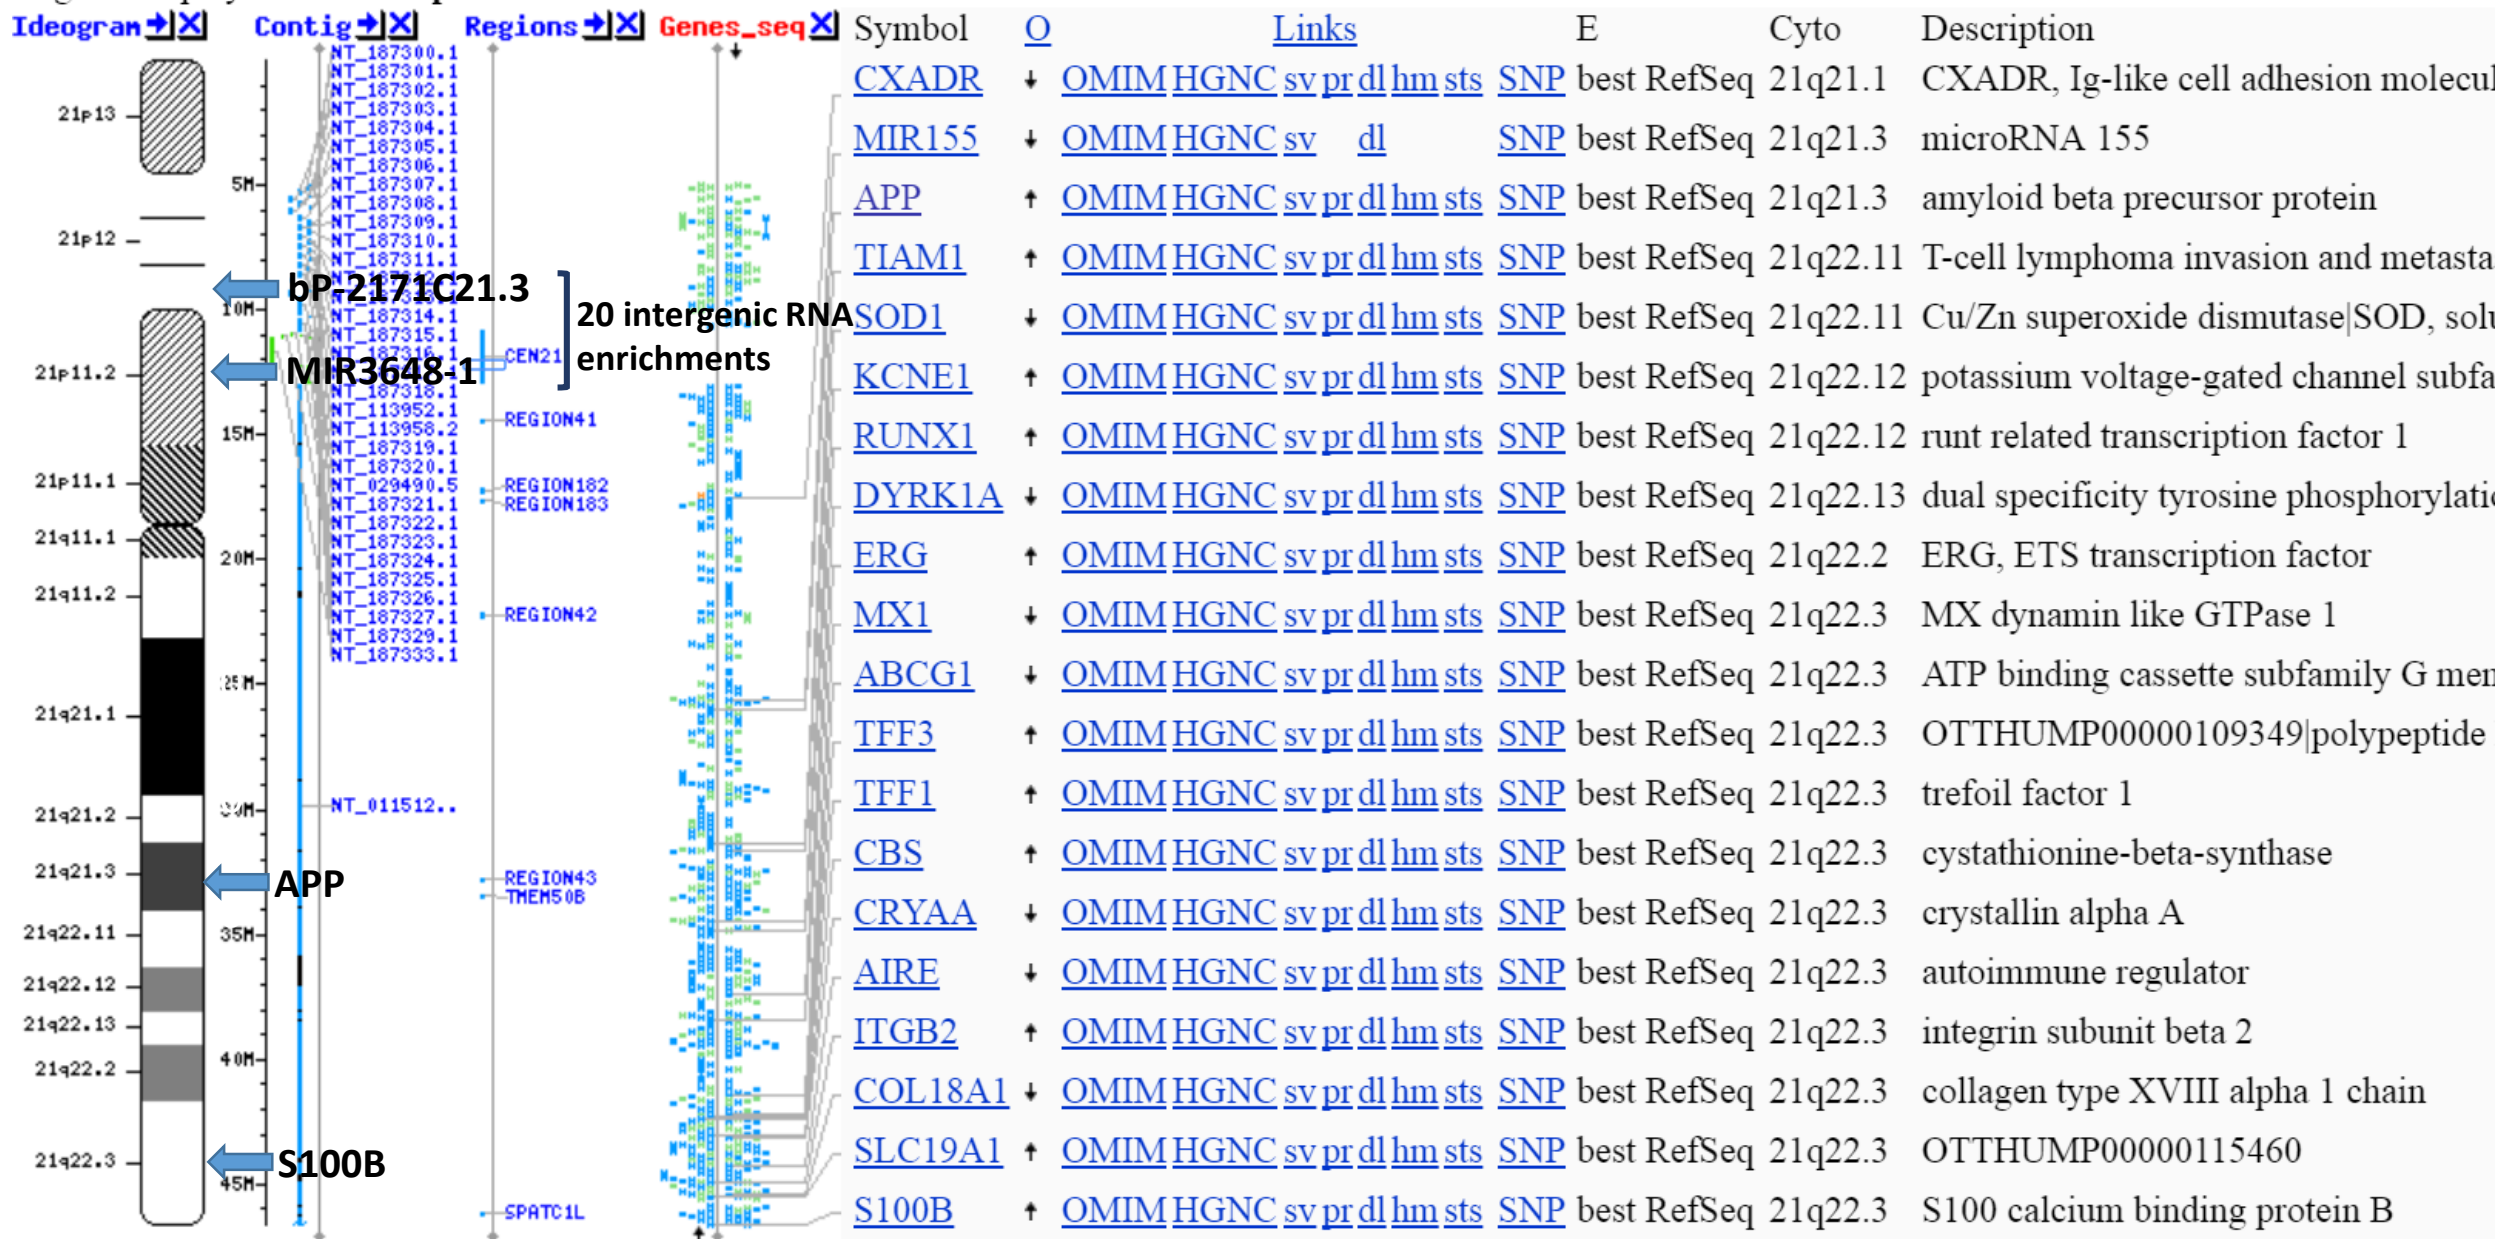

**Supplementary Figure 2.** G-quadruplex forming regions plotted to illustrate the number of quadruplexes per DNA or RNA segment.

### A. G4-forming regions in DNA (both strands)

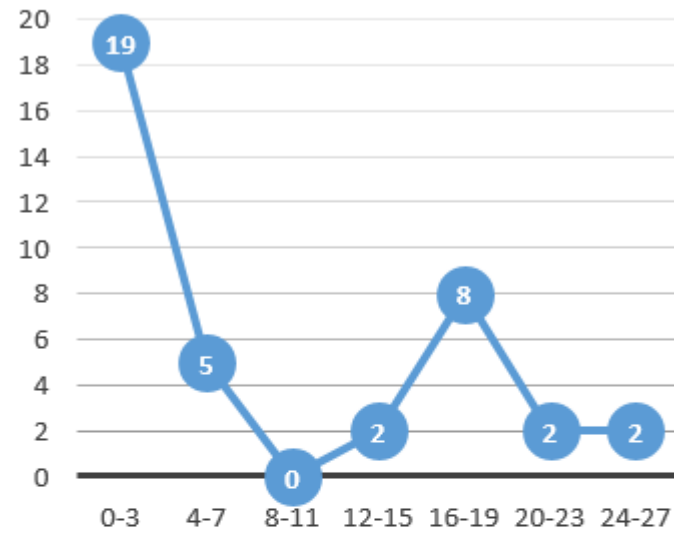

### B. G4-forming regions in RNA (+ strand)

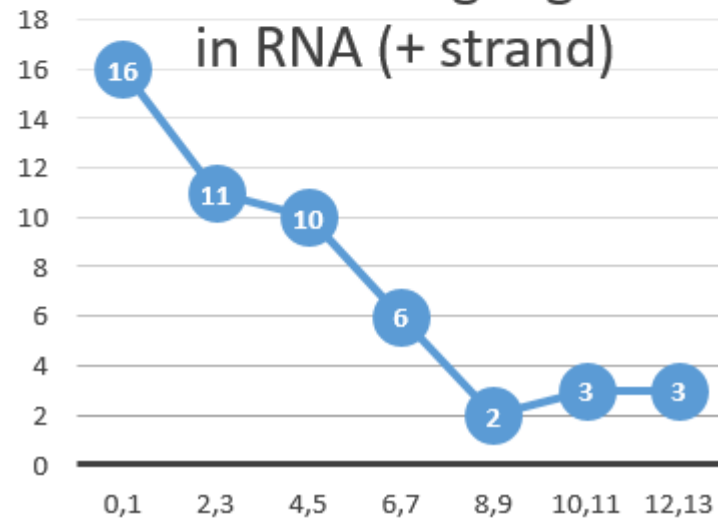

### Supplementary Figure 3.

Translational inhibition by *EEF2* knockdown reduces aggregate RNA in SY5Y-APP<sub>Sw</sub> cells but not significantly in SY5Y cells. Blocking proteasome function with MG132 does not increase the amount of RNA sequestered into aggregates in either cell line.

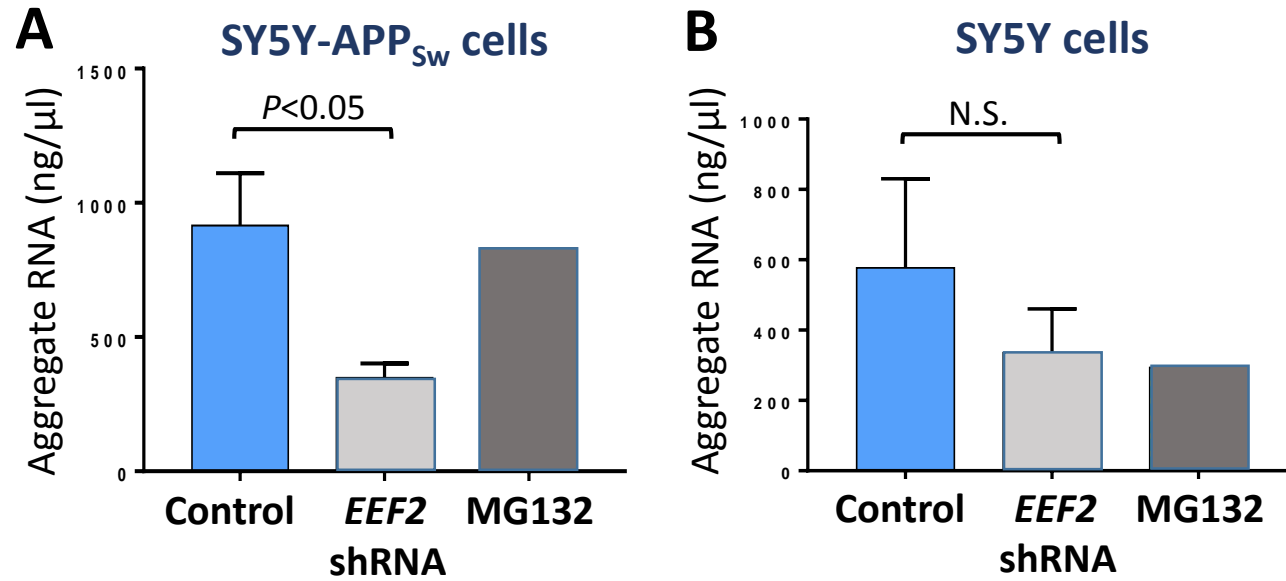

Supplement: ACEL-20-e13326-s002.pdf [file ACEL-20-e13326-s002.pdf]
